# Supplementary material for: Support for the higher-order factor structure of the WHODAS 2.0 self-report version in a Dutch outpatient psychiatric setting
Source: Springer Nature journal article supplement (doi:10.1007/s11136-021-02880-8), 2021-06-12
Supplement: MOESM1 [file 19253504]

Online supplement A  
Fit indices and Standardized Coefficients CFA's

Title: Confirmation of the WHODAS 2.0 factor structure for the self-report version in a Dutch outpatient psychiatric setting

Journal: Quality of Life Research

Authors: Guido L. Williams, Edwin de Beurs, Philip Spinhoven, Gerard Flens, Muirne C. S. Paap

Corresponding author: Dimence Group, Dimence foundation, Specialized Assessment and Treatment Division, Department of Digital Mental Healthcare, Deventer, The Netherlands; g.williams@thubble.nl; ORCID 0000-0001-8008-5750

Table 3 Supplement  
Confirmatory Factor Analysis (CFA) Fit Indices Working Sample (n = 482)

| Model                    | $X^2$           | <i>p-value</i> | <i>df</i>  | $\frac{X^2}{df}$ | CFI          | TLI          | RMSEA        | SRMR         |
|--------------------------|-----------------|----------------|------------|------------------|--------------|--------------|--------------|--------------|
| 1 Factor                 | 9111.867        | 0.001          | 594        | 15.339           | 0.917        | 0.912        | 0.173        | 0.144        |
| <b>6 Factor</b>          | <b>3435.659</b> | <b>0.001</b>   | <b>579</b> | <b>5.934</b>     | <b>0.972</b> | <b>0.970</b> | <b>0.101</b> | <b>0.096</b> |
| <b>7 Factor</b>          | <b>1360.598</b> | <b>0.001</b>   | <b>573</b> | <b>2.375</b>     | <b>0.992</b> | <b>0.992</b> | <b>0.053</b> | <b>0.059</b> |
| 2 <sup>nd</sup> order 6F | 3708.296        | 0.001          | 588        | 6.307            | 0.970        | 0.968        | 0.105        | 0.100        |
| 2 <sup>nd</sup> order 7F | 1780.579        | 0.001          | 587        | 3.033            | 0.988        | 0.988        | 0.065        | 0.069        |

Table 4 Supplement  
Confirmatory Factor Analysis (CFA) Fit Indices Non-Working Sample (n = 287)

| Model                    | $X^2$          | <i>p-value</i> | <i>df</i>  | $\frac{X^2}{df}$ | CFI          | TLI          | RMSEA        | SRMR         |
|--------------------------|----------------|----------------|------------|------------------|--------------|--------------|--------------|--------------|
| 1 Factor                 | 3705.270       | 0.001          | 464        | 7.986            | 0.931        | 0.926        | 0.156        | 0.127        |
| <b>6 Factor</b>          | <b>901.305</b> | <b>0.001</b>   | <b>449</b> | <b>2.007</b>     | <b>0.990</b> | <b>0.989</b> | <b>0.059</b> | <b>0.069</b> |
| 2 <sup>nd</sup> order 6F | 1094.409       | 0.001          | 458        | 2.389            | 0.986        | 0.985        | 0.070        | 0.077        |

Table 5 Supplement  
Confirmatory Factor Analysis (CFA) Fit Indices Imputed Sample (n = 770)

| Model                    | $X^2$           | <i>p-value</i> | <i>df</i>  | $\frac{X^2}{df}$ | CFI          | TLI          | RMSEA        | SRMR         |
|--------------------------|-----------------|----------------|------------|------------------|--------------|--------------|--------------|--------------|
| 1 Factor                 | 16658.644       | 0.001          | 594        | 28.04            | 0.904        | 0.898        | 0.188        | 0.161        |
| <b>6 Factor</b>          | <b>6025.203</b> | <b>0.001</b>   | <b>579</b> | <b>10.41</b>     | <b>0.967</b> | <b>0.965</b> | <b>0.111</b> | <b>0.107</b> |
| <b>7 Factor</b>          | <b>1939.622</b> | <b>0.001</b>   | <b>573</b> | <b>3.385</b>     | <b>0.992</b> | <b>0.991</b> | <b>0.056</b> | <b>0.055</b> |
| 2 <sup>nd</sup> order 6F | 6472.337        | 0.001          | 588        | 11.01            | 0.965        | 0.962        | 0.114        | 0.111        |
| 2 <sup>nd</sup> order 7F | 2574.417        | 0.001          | 587        | 4.386            | 0.988        | 0.987        | 0.066        | 0.065        |

Table 9. Standardized Coefficients CFA Unidimensional Model

| Observed | Latent  | Working |           | Non-Working |           | Imputed |           |
|----------|---------|---------|-----------|-------------|-----------|---------|-----------|
|          |         | $\beta$ | <i>SE</i> | $\beta$     | <i>SE</i> | $\beta$ | <i>SE</i> |
| D1.1     | General | 0.61    | 0.03      | 0.63        | 0.03      | 0.61    | 0.02      |
| D1.2     | General | 0.58    | 0.03      | 0.61        | 0.03      | 0.59    | 0.02      |
| D1.3     | General | 0.59    | 0.03      | 0.56        | 0.04      | 0.58    | 0.02      |
| D1.4     | General | 0.59    | 0.03      | 0.57        | 0.04      | 0.58    | 0.02      |
| D1.5     | General | 0.61    | 0.03      | 0.55        | 0.04      | 0.59    | 0.02      |
| D1.6     | General | 0.55    | 0.03      | 0.57        | 0.04      | 0.55    | 0.02      |
| D2.1     | General | 0.56    | 0.03      | 0.62        | 0.04      | 0.60    | 0.02      |
| D2.2     | General | 0.58    | 0.03      | 0.70        | 0.03      | 0.64    | 0.02      |
| D2.3     | General | 0.68    | 0.03      | 0.71        | 0.03      | 0.70    | 0.02      |
| D2.4     | General | 0.64    | 0.03      | 0.64        | 0.03      | 0.65    | 0.02      |
| D2.5     | General | 0.63    | 0.03      | 0.69        | 0.03      | 0.65    | 0.02      |
| D3.1     | General | 0.72    | 0.03      | 0.83        | 0.02      | 0.78    | 0.02      |
| D3.2     | General | 0.71    | 0.03      | 0.82        | 0.02      | 0.77    | 0.02      |
| D3.3     | General | 0.47    | 0.03      | 0.55        | 0.04      | 0.50    | 0.03      |
| D3.4     | General | 0.42    | 0.04      | 0.52        | 0.04      | 0.45    | 0.03      |
| D4.1     | General | 0.63    | 0.03      | 0.65        | 0.03      | 0.64    | 0.02      |
| D4.2     | General | 0.59    | 0.03      | 0.60        | 0.04      | 0.59    | 0.02      |
| D4.3     | General | 0.60    | 0.03      | 0.63        | 0.03      | 0.60    | 0.02      |
| D4.4     | General | 0.60    | 0.03      | 0.61        | 0.04      | 0.60    | 0.02      |
| D4.5     | General | 0.43    | 0.04      | 0.45        | 0.05      | 0.44    | 0.03      |
| D5.1     | General | 0.85    | 0.01      | 0.91        | 0.01      | 0.88    | 0.01      |
| D5.2     | General | 0.81    | 0.01      | 0.89        | 0.01      | 0.85    | 0.01      |
| D5.3     | General | 0.83    | 0.01      | 0.89        | 0.01      | 0.86    | 0.01      |
| D5.4     | General | 0.79    | 0.02      | 0.80        | 0.02      | 0.80    | 0.01      |
| D5.5     | General | 0.79    | 0.02      | N/A         | N/A       | 0.74    | 0.01      |
| D5.6     | General | 0.86    | 0.01      | N/A         | N/A       | 0.83    | 0.01      |
| D5.7     | General | 0.93    | 0.01      | N/A         | N/A       | 0.86    | 0.01      |
| D5.8     | General | 0.88    | 0.01      | N/A         | N/A       | 0.72    | 0.01      |
| D6.1     | General | 0.67    | 0.02      | 0.64        | 0.03      | 0.66    | 0.02      |
| D6.2     | General | 0.67    | 0.02      | 0.64        | 0.03      | 0.66    | 0.02      |
| D6.3     | General | 0.52    | 0.03      | 0.57        | 0.04      | 0.54    | 0.02      |
| D6.4     | General | 0.41    | 0.03      | 0.41        | 0.05      | 0.41    | 0.03      |
| D6.5     | General | 0.56    | 0.03      | 0.58        | 0.04      | 0.57    | 0.02      |
| D6.6     | General | 0.40    | 0.04      | 0.41        | 0.05      | 0.42    | 0.03      |
| D6.7     | General | 0.47    | 0.03      | 0.47        | 0.04      | 0.47    | 0.03      |
| D6.8     | General | 0.57    | 0.03      | 0.59        | 0.04      | 0.57    | 0.02      |

*Note.* CFA = Confirmatory Factor Analysis

Table 10. Standardized Coefficients CFA 6 Factor Correlated Traits Model

| Observed | Latent          | Working |           | Non-Working |           | Imputed |           |
|----------|-----------------|---------|-----------|-------------|-----------|---------|-----------|
|          |                 | $\beta$ | <i>SE</i> | $\beta$     | <i>SE</i> | $\beta$ | <i>SE</i> |
| D1.1     | Cognition       | 0.76    | 0.02      | 0.79        | 0.03      | 0.77    | 0.02      |
| D1.2     | Cognition       | 0.72    | 0.03      | 0.76        | 0.03      | 0.74    | 0.02      |
| D1.3     | Cognition       | 0.74    | 0.03      | 0.70        | 0.04      | 0.73    | 0.02      |
| D1.4     | Cognition       | 0.73    | 0.03      | 0.72        | 0.04      | 0.74    | 0.02      |
| D1.5     | Cognition       | 0.74    | 0.03      | 0.69        | 0.04      | 0.74    | 0.02      |
| D1.6     | Cognition       | 0.69    | 0.03      | 0.72        | 0.04      | 0.70    | 0.02      |
| D2.1     | Mobility        | 0.76    | 0.03      | 0.76        | 0.03      | 0.77    | 0.02      |
| D2.2     | Mobility        | 0.76    | 0.03      | 0.84        | 0.03      | 0.81    | 0.02      |
| D2.3     | Mobility        | 0.87    | 0.03      | 0.86        | 0.03      | 0.88    | 0.02      |
| D2.4     | Mobility        | 0.87    | 0.03      | 0.82        | 0.03      | 0.85    | 0.02      |
| D2.5     | Mobility        | 0.81    | 0.03      | 0.81        | 0.03      | 0.81    | 0.02      |
| D3.1     | Self-Care       | 0.90    | 0.03      | 0.94        | 0.02      | 0.93    | 0.02      |
| D3.2     | Self-Care       | 0.92    | 0.03      | 0.92        | 0.02      | 0.92    | 0.02      |
| D3.3     | Self-Care       | 0.68    | 0.04      | 0.72        | 0.04      | 0.69    | 0.03      |
| D3.4     | Self-Care       | 0.60    | 0.04      | 0.68        | 0.05      | 0.62    | 0.03      |
| D4.1     | Getting Along   | 0.83    | 0.02      | 0.81        | 0.03      | 0.82    | 0.02      |
| D4.2     | Getting Along   | 0.78    | 0.02      | 0.75        | 0.03      | 0.77    | 0.02      |
| D4.3     | Getting Along   | 0.78    | 0.03      | 0.78        | 0.03      | 0.77    | 0.02      |
| D4.4     | Getting Along   | 0.79    | 0.02      | 0.77        | 0.03      | 0.78    | 0.02      |
| D4.5     | Getting Along   | 0.56    | 0.04      | 0.56        | 0.05      | 0.57    | 0.03      |
| D5.1     | Life Activities | 0.90    | 0.01      | 0.95        | 0.01      | 0.92    | 0.01      |
| D5.2     | Life Activities | 0.87    | 0.01      | 0.94        | 0.01      | 0.91    | 0.01      |
| D5.3     | Life Activities | 0.88    | 0.01      | 0.93        | 0.01      | 0.90    | 0.01      |
| D5.4     | Life Activities | 0.85    | 0.01      | 0.87        | 0.02      | 0.86    | 0.01      |
| D5.5     | Life Activities | 0.84    | 0.01      | N/A         | N/A       | 0.81    | 0.01      |
| D5.6     | Life Activities | 0.90    | 0.01      | N/A         | N/A       | 0.88    | 0.01      |
| D5.7     | Life Activities | 0.95    | 0.01      | N/A         | N/A       | 0.91    | 0.01      |
| D5.8     | Life Activities | 0.91    | 0.01      | N/A         | N/A       | 0.79    | 0.01      |
| D6.1     | Participation   | 0.82    | 0.02      | 0.78        | 0.03      | 0.81    | 0.02      |
| D6.2     | Participation   | 0.81    | 0.02      | 0.78        | 0.03      | 0.81    | 0.02      |
| D6.3     | Participation   | 0.64    | 0.03      | 0.70        | 0.04      | 0.68    | 0.02      |
| D6.4     | Participation   | 0.51    | 0.04      | 0.51        | 0.05      | 0.52    | 0.03      |
| D6.5     | Participation   | 0.69    | 0.03      | 0.72        | 0.04      | 0.71    | 0.02      |
| D6.6     | Participation   | 0.49    | 0.05      | 0.53        | 0.05      | 0.53    | 0.03      |
| D6.7     | Participation   | 0.59    | 0.04      | 0.60        | 0.04      | 0.59    | 0.03      |
| D6.8     | Participation   | 0.69    | 0.03      | 0.74        | 0.04      | 0.71    | 0.02      |

*Note.* CFA = Confirmatory Factor Analysis

Table 11. Standardized Coefficients CFA 7 Factor Correlated Traits Model

| Observed | Latent        | Working |           | Non-Working |           | Imputed |           |
|----------|---------------|---------|-----------|-------------|-----------|---------|-----------|
|          |               | $\beta$ | <i>SE</i> | $\beta$     | <i>SE</i> | $\beta$ | <i>SE</i> |
| D1.1     | Cognition     | 0.76    | 0.02      | N/A         | N/A       | 0.76    | 0.02      |
| D1.2     | Cognition     | 0.72    | 0.03      | N/A         | N/A       | 0.74    | 0.02      |
| D1.3     | Cognition     | 0.74    | 0.03      | N/A         | N/A       | 0.73    | 0.02      |
| D1.4     | Cognition     | 0.73    | 0.03      | N/A         | N/A       | 0.74    | 0.02      |
| D1.5     | Cognition     | 0.74    | 0.03      | N/A         | N/A       | 0.73    | 0.02      |
| D1.6     | Cognition     | 0.69    | 0.03      | N/A         | N/A       | 0.70    | 0.02      |
| D2.1     | Mobility      | 0.76    | 0.03      | N/A         | N/A       | 0.77    | 0.02      |
| D2.2     | Mobility      | 0.76    | 0.03      | N/A         | N/A       | 0.81    | 0.02      |
| D2.3     | Mobility      | 0.87    | 0.03      | N/A         | N/A       | 0.87    | 0.02      |
| D2.4     | Mobility      | 0.86    | 0.03      | N/A         | N/A       | 0.85    | 0.02      |
| D2.5     | Mobility      | 0.81    | 0.03      | N/A         | N/A       | 0.81    | 0.02      |
| D3.1     | Self-Care     | 0.90    | 0.03      | N/A         | N/A       | 0.93    | 0.02      |
| D3.2     | Self-Care     | 0.92    | 0.03      | N/A         | N/A       | 0.92    | 0.02      |
| D3.3     | Self-Care     | 0.68    | 0.04      | N/A         | N/A       | 0.70    | 0.03      |
| D3.4     | Self-Care     | 0.60    | 0.04      | N/A         | N/A       | 0.63    | 0.03      |
| D4.1     | Getting Along | 0.83    | 0.02      | N/A         | N/A       | 0.82    | 0.02      |
| D4.2     | Getting Along | 0.78    | 0.02      | N/A         | N/A       | 0.77    | 0.02      |
| D4.3     | Getting Along | 0.78    | 0.03      | N/A         | N/A       | 0.77    | 0.02      |
| D4.4     | Getting Along | 0.79    | 0.02      | N/A         | N/A       | 0.78    | 0.02      |
| D4.5     | Getting Along | 0.56    | 0.04      | N/A         | N/A       | 0.57    | 0.03      |
| D5.1     | LA Household  | 0.92    | 0.01      | N/A         | N/A       | 0.94    | 0.01      |
| D5.2     | LA Household  | 0.91    | 0.01      | N/A         | N/A       | 0.92    | 0.01      |
| D5.3     | LA Household  | 0.90    | 0.01      | N/A         | N/A       | 0.92    | 0.01      |
| D5.4     | LA Household  | 0.90    | 0.01      | N/A         | N/A       | 0.89    | 0.01      |
| D5.5     | LA Working    | 0.89    | 0.01      | N/A         | N/A       | 0.87    | 0.01      |
| D5.6     | LA Working    | 0.93    | 0.01      | N/A         | N/A       | 0.92    | 0.01      |
| D5.7     | LA Working    | 0.96    | 0.01      | N/A         | N/A       | 0.94    | 0.01      |
| D5.8     | LA Working    | 0.93    | 0.01      | N/A         | N/A       | 0.86    | 0.01      |
| D6.1     | Participation | 0.82    | 0.02      | N/A         | N/A       | 0.81    | 0.02      |
| D6.2     | Participation | 0.81    | 0.02      | N/A         | N/A       | 0.81    | 0.02      |
| D6.3     | Participation | 0.64    | 0.03      | N/A         | N/A       | 0.68    | 0.02      |
| D6.4     | Participation | 0.51    | 0.04      | N/A         | N/A       | 0.52    | 0.03      |
| D6.5     | Participation | 0.69    | 0.03      | N/A         | N/A       | 0.71    | 0.02      |
| D6.6     | Participation | 0.49    | 0.05      | N/A         | N/A       | 0.53    | 0.03      |
| D6.7     | Participation | 0.59    | 0.04      | N/A         | N/A       | 0.59    | 0.03      |
| D6.8     | Participation | 0.69    | 0.03      | N/A         | N/A       | 0.71    | 0.02      |

*Note.* CFA = Confirmatory Factor Analysis

Table 12. Standardized Coefficients 2<sup>nd</sup> order 6 Factor Model

| Observed | Latent          | Working |           | Non-Working |           | Imputed |           |
|----------|-----------------|---------|-----------|-------------|-----------|---------|-----------|
|          |                 | $\beta$ | <i>SE</i> | $\beta$     | <i>SE</i> | $\beta$ | <i>SE</i> |
| D1.1     | Cognition       | 0.76    | 0.02      | 0.79        | 0.03      | 0.77    | 0.02      |
| D1.2     | Cognition       | 0.72    | 0.03      | 0.76        | 0.03      | 0.74    | 0.02      |
| D1.3     | Cognition       | 0.74    | 0.03      | 0.70        | 0.04      | 0.73    | 0.02      |
| D1.4     | Cognition       | 0.73    | 0.03      | 0.72        | 0.04      | 0.74    | 0.02      |
| D1.5     | Cognition       | 0.75    | 0.03      | 0.69        | 0.04      | 0.74    | 0.02      |
| D1.6     | Cognition       | 0.68    | 0.03      | 0.72        | 0.04      | 0.70    | 0.02      |
| D2.1     | Mobility        | 0.75    | 0.03      | 0.76        | 0.03      | 0.77    | 0.02      |
| D2.2     | Mobility        | 0.75    | 0.03      | 0.84        | 0.03      | 0.81    | 0.02      |
| D2.3     | Mobility        | 0.87    | 0.03      | 0.86        | 0.03      | 0.88    | 0.02      |
| D2.4     | Mobility        | 0.87    | 0.03      | 0.81        | 0.03      | 0.85    | 0.02      |
| D2.5     | Mobility        | 0.81    | 0.03      | 0.82        | 0.03      | 0.81    | 0.02      |
| D3.1     | Self-Care       | 0.90    | 0.03      | 0.94        | 0.02      | 0.93    | 0.02      |
| D3.2     | Self-Care       | 0.92    | 0.03      | 0.92        | 0.02      | 0.92    | 0.02      |
| D3.3     | Self-Care       | 0.68    | 0.04      | 0.72        | 0.04      | 0.70    | 0.03      |
| D3.4     | Self-Care       | 0.60    | 0.04      | 0.68        | 0.05      | 0.62    | 0.03      |
| D4.1     | Getting Along   | 0.83    | 0.02      | 0.81        | 0.03      | 0.83    | 0.02      |
| D4.2     | Getting Along   | 0.78    | 0.02      | 0.75        | 0.03      | 0.77    | 0.02      |
| D4.3     | Getting Along   | 0.78    | 0.03      | 0.79        | 0.03      | 0.77    | 0.02      |
| D4.4     | Getting Along   | 0.78    | 0.02      | 0.76        | 0.03      | 0.77    | 0.02      |
| D4.5     | Getting Along   | 0.56    | 0.04      | 0.56        | 0.05      | 0.57    | 0.03      |
| D5.1     | Life Activities | 0.90    | 0.01      | 0.95        | 0.01      | 0.92    | 0.01      |
| D5.2     | Life Activities | 0.87    | 0.01      | 0.94        | 0.01      | 0.91    | 0.01      |
| D5.3     | Life Activities | 0.88    | 0.01      | 0.93        | 0.01      | 0.90    | 0.01      |
| D5.4     | Life Activities | 0.85    | 0.01      | 0.87        | 0.02      | 0.86    | 0.01      |
| D5.5     | Life Activities | 0.84    | 0.01      | N/A         | N/A       | 0.81    | 0.01      |
| D5.6     | Life Activities | 0.90    | 0.01      | N/A         | N/A       | 0.88    | 0.01      |
| D5.7     | Life Activities | 0.95    | 0.01      | N/A         | N/A       | 0.91    | 0.01      |
| D5.8     | Life Activities | 0.91    | 0.01      | N/A         | N/A       | 0.79    | 0.01      |
| D6.1     | Participation   | 0.82    | 0.02      | 0.78        | 0.03      | 0.81    | 0.02      |
| D6.2     | Participation   | 0.81    | 0.02      | 0.78        | 0.03      | 0.81    | 0.02      |
| D6.3     | Participation   | 0.64    | 0.03      | 0.70        | 0.04      | 0.68    | 0.02      |
| D6.4     | Participation   | 0.50    | 0.04      | 0.51        | 0.05      | 0.52    | 0.03      |
| D6.5     | Participation   | 0.69    | 0.03      | 0.72        | 0.04      | 0.71    | 0.02      |
| D6.6     | Participation   | 0.49    | 0.05      | 0.53        | 0.05      | 0.53    | 0.03      |
| D6.7     | Participation   | 0.59    | 0.04      | 0.60        | 0.04      | 0.59    | 0.03      |
| D6.8     | Participation   | 0.69    | 0.03      | 0.74        | 0.04      | 0.71    | 0.02      |
| SOF      | Cognition       | 0.84    | 0.02      | 0.76        | 0.04      | 0.81    | 0.02      |
| SOF      | Mobility        | 0.72    | 0.03      | 0.77        | 0.03      | 0.75    | 0.02      |
| SOF      | Self-Care       | 0.72    | 0.03      | 0.74        | 0.03      | 0.73    | 0.02      |
| SOF      | Getting Along   | 0.77    | 0.03      | 0.80        | 0.03      | 0.78    | 0.02      |
| SOF      | Life Activities | 0.67    | 0.02      | 0.73        | 0.03      | 0.63    | 0.02      |
| SOF      | Participation   | 0.85    | 0.02      | 0.77        | 0.04      | 0.82    | 0.02      |

*Note.* CFA = Confirmatory Factor Analysis; SOF = Second Order Factor

Table 13. Standardized Coefficients 2<sup>nd</sup> order 7 Factor Model

| Observed | Latent        | Working |           | Non-Working |           | Imputed |           |
|----------|---------------|---------|-----------|-------------|-----------|---------|-----------|
|          |               | $\beta$ | <i>SE</i> | $\beta$     | <i>SE</i> | $\beta$ | <i>SE</i> |
| D1.1     | Cognition     | 0.76    | 0.02      | N/A         | N/A       | 0.76    | 0.02      |
| D1.2     | Cognition     | 0.72    | 0.03      | N/A         | N/A       | 0.74    | 0.02      |
| D1.3     | Cognition     | 0.74    | 0.03      | N/A         | N/A       | 0.73    | 0.02      |
| D1.4     | Cognition     | 0.73    | 0.03      | N/A         | N/A       | 0.74    | 0.02      |
| D1.5     | Cognition     | 0.75    | 0.03      | N/A         | N/A       | 0.74    | 0.02      |
| D1.6     | Cognition     | 0.68    | 0.03      | N/A         | N/A       | 0.70    | 0.02      |
| D2.1     | Mobility      | 0.76    | 0.03      | N/A         | N/A       | 0.77    | 0.02      |
| D2.2     | Mobility      | 0.76    | 0.03      | N/A         | N/A       | 0.81    | 0.02      |
| D2.3     | Mobility      | 0.87    | 0.03      | N/A         | N/A       | 0.88    | 0.02      |
| D2.4     | Mobility      | 0.87    | 0.03      | N/A         | N/A       | 0.85    | 0.02      |
| D2.5     | Mobility      | 0.81    | 0.03      | N/A         | N/A       | 0.81    | 0.02      |
| D3.1     | Self-Care     | 0.90    | 0.03      | N/A         | N/A       | 0.93    | 0.02      |
| D3.2     | Self-Care     | 0.92    | 0.03      | N/A         | N/A       | 0.92    | 0.02      |
| D3.3     | Self-Care     | 0.68    | 0.04      | N/A         | N/A       | 0.70    | 0.03      |
| D3.4     | Self-Care     | 0.60    | 0.04      | N/A         | N/A       | 0.63    | 0.03      |
| D4.1     | Getting Along | 0.83    | 0.02      | N/A         | N/A       | 0.83    | 0.02      |
| D4.2     | Getting Along | 0.78    | 0.02      | N/A         | N/A       | 0.77    | 0.02      |
| D4.3     | Getting Along | 0.78    | 0.03      | N/A         | N/A       | 0.78    | 0.02      |
| D4.4     | Getting Along | 0.78    | 0.02      | N/A         | N/A       | 0.77    | 0.02      |
| D4.5     | Getting Along | 0.56    | 0.04      | N/A         | N/A       | 0.57    | 0.03      |
| D5.1     | LA Household  | 0.92    | 0.01      | N/A         | N/A       | 0.94    | 0.01      |
| D5.2     | LA Household  | 0.91    | 0.01      | N/A         | N/A       | 0.92    | 0.01      |
| D5.3     | LA Household  | 0.90    | 0.01      | N/A         | N/A       | 0.92    | 0.01      |
| D5.4     | LA Household  | 0.89    | 0.01      | N/A         | N/A       | 0.89    | 0.01      |
| D5.5     | LA Working    | 0.89    | 0.01      | N/A         | N/A       | 0.87    | 0.01      |
| D5.6     | LA Working    | 0.93    | 0.01      | N/A         | N/A       | 0.92    | 0.01      |
| D5.7     | LA Working    | 0.96    | 0.01      | N/A         | N/A       | 0.94    | 0.01      |
| D5.8     | LA Working    | 0.93    | 0.01      | N/A         | N/A       | 0.86    | 0.01      |
| D6.1     | Participation | 0.83    | 0.02      | N/A         | N/A       | 0.81    | 0.02      |
| D6.2     | Participation | 0.81    | 0.02      | N/A         | N/A       | 0.81    | 0.02      |
| D6.3     | Participation | 0.64    | 0.03      | N/A         | N/A       | 0.68    | 0.02      |
| D6.4     | Participation | 0.50    | 0.04      | N/A         | N/A       | 0.51    | 0.03      |
| D6.5     | Participation | 0.69    | 0.03      | N/A         | N/A       | 0.71    | 0.02      |
| D6.6     | Participation | 0.49    | 0.05      | N/A         | N/A       | 0.53    | 0.03      |
| D6.7     | Participation | 0.58    | 0.04      | N/A         | N/A       | 0.59    | 0.03      |
| D6.8     | Participation | 0.69    | 0.03      | N/A         | N/A       | 0.71    | 0.03      |
| SOF      | Cognition     | 0.84    | 0.02      | N/A         | N/A       | 0.81    | 0.02      |
| SOF      | Mobility      | 0.72    | 0.03      | N/A         | N/A       | 0.75    | 0.02      |
| SOF      | Self-Care     | 0.72    | 0.03      | N/A         | N/A       | 0.73    | 0.02      |
| SOF      | Getting Along | 0.77    | 0.03      | N/A         | N/A       | 0.79    | 0.02      |
| SOF      | LA Household  | 0.69    | 0.03      | N/A         | N/A       | 0.72    | 0.02      |
| SOF      | LA Working    | 0.59    | 0.03      | N/A         | N/A       | 0.45    | 0.03      |
| SOF      | Participation | 0.85    | 0.02      | N/A         | N/A       | 0.82    | 0.02      |

*Note.* CFA = Confirmatory Factor Analysis; SOF = Second Order Factor
