# Supplementary material for: Support for the higher-order factor structure of the WHODAS 2.0 self-report version in a Dutch outpatient psychiatric setting
Source: Springer Nature journal article supplement (doi:10.1007/s11136-021-02880-8), 2021-06-12
Supplement: MOESM2 [file 19253886]

Online supplement B  
Item descriptive statistics and Likert scale distributions

Title: Support WHODAS 2.0 factor structure

Journal: Quality of Life Research

Authors: Guido L. Williams, Edwin de Beurs, Philip Spinhoven, Gerard Flens, Muirne C. S. Paap

Corresponding author: Dimence Group, Dimence foundation, Specialized Assessment and Treatment Division, Department of Digital Mental Healthcare, Deventer, The Netherlands; g.williams@thubble.nl; ORCID 0000-0001-8008-5750

Table 14. Item Descriptive Statistics WHODAS 2.0 (n = 770)

| Item              | <i>Mean</i> | <i>sd</i> | <i>median</i> | <i>mad<sup>a</sup></i> | <i>skew</i> | <i>kurtosis</i> | <i>se</i> |
|-------------------|-------------|-----------|---------------|------------------------|-------------|-----------------|-----------|
| D1.1              | 2.8         | 1.3       | 3             | 1.5                    | 0.1         | -1.1            | 0.05      |
| D1.2              | 2.9         | 1.3       | 3             | 1.5                    | 0.1         | -1.2            | 0.05      |
| D1.3              | 2.9         | 1.2       | 3             | 1.5                    | -0.0        | -1.0            | 0.04      |
| D1.4              | 2.4         | 1.4       | 2             | 1.5                    | 0.5         | -1.0            | 0.05      |
| D1.5              | 2.1         | 1.1       | 2             | 1.5                    | 0.8         | -0.3            | 0.04      |
| D1.6              | 2.5         | 1.3       | 2             | 1.5                    | 0.4         | -1.0            | 0.05      |
| D2.1              | 2.3         | 1.4       | 2             | 1.5                    | 0.7         | -0.9            | 0.05      |
| D2.2              | 1.9         | 1.2       | 1             | 0.0                    | 1.1         | -0.0            | 0.04      |
| D2.3              | 1.7         | 1.1       | 1             | 0.0                    | 1.4         | 0.9             | 0.04      |
| D2.4              | 2.3         | 1.3       | 2             | 1.5                    | 0.6         | -0.9            | 0.05      |
| D2.5              | 2.0         | 1.4       | 1             | 0.0                    | 1.1         | -0.1            | 0.05      |
| D3.1              | 1.6         | 1.0       | 1             | 0.0                    | 1.9         | 2.7             | 0.04      |
| D3.2              | 1.5         | 1.0       | 1             | 0.0                    | 1.9         | 2.8             | 0.04      |
| D3.3              | 2.0         | 1.2       | 2             | 1.5                    | 1.0         | -0.1            | 0.04      |
| D3.4              | 2.3         | 1.4       | 2             | 1.5                    | 0.7         | -0.9            | 0.05      |
| D4.1              | 2.4         | 1.3       | 2             | 1.5                    | 0.6         | -0.8            | 0.05      |
| D4.2              | 2.6         | 1.3       | 2             | 1.5                    | 0.3         | -1.0            | 0.05      |
| D4.3              | 2.1         | 1.1       | 2             | 1.5                    | 0.7         | -0.4            | 0.04      |
| D4.4              | 2.9         | 1.5       | 3             | 3.0                    | 0.1         | -1.5            | 0.06      |
| D4.5              | 2.6         | 1.6       | 2             | 1.5                    | 0.4         | -1.4            | 0.06      |
| D5.1              | 2.7         | 1.3       | 3             | 1.5                    | 0.3         | -1.1            | 0.05      |
| D5.2              | 2.4         | 1.3       | 2             | 1.5                    | 0.5         | -0.9            | 0.05      |
| D5.3              | 2.7         | 1.3       | 3             | 1.5                    | 0.2         | -1.1            | 0.05      |
| D5.4              | 2.7         | 1.4       | 3             | 1.5                    | 0.2         | -1.2            | 0.05      |
| D5.5 <sup>b</sup> | 3.2         | 1.4       | 3             | 1.5                    | -0.1        | -1.3            | 0.06      |
| D5.6 <sup>b</sup> | 3.0         | 1.4       | 3             | 1.5                    | 0.1         | -1.3            | 0.06      |
| D5.7 <sup>b</sup> | 3.0         | 1.5       | 3             | 1.5                    | 0.0         | -1.4            | 0.06      |
| D5.8 <sup>b</sup> | 3.0         | 1.5       | 3             | 1.5                    | 0.1         | -1.4            | 0.06      |
| D6.1              | 3.0         | 1.4       | 3             | 1.5                    | -0.8        | -1.2            | 0.05      |
| D6.2              | 2.8         | 1.4       | 3             | 1.5                    | 0.1         | -1.3            | 0.05      |
| D6.3              | 2.4         | 1.3       | 2             | 1.5                    | 0.4         | -1.1            | 0.05      |
| D6.4              | 3.0         | 1.2       | 3             | 1.5                    | 0.0         | -1.1            | 0.05      |
| D6.5              | 3.3         | 1.3       | 4             | 1.5                    | -0.3        | -0.9            | 0.05      |

|      |     |     |   |     |      |      |      |
|------|-----|-----|---|-----|------|------|------|
| D6.6 | 2.0 | 1.3 | 1 | 0.0 | 1.0  | -0.4 | 0.05 |
| D6.7 | 2.7 | 1.3 | 3 | 1.5 | 0.2  | -1.1 | 0.05 |
| D6.8 | 3.3 | 1.3 | 3 | 1.5 | -0.3 | -1.1 | 0.05 |

<sup>a</sup> median absolute deviation

<sup>b</sup> n = 483

Table 15. Percentages Table Likert Scale Distributions WHODAS 2.0 (n = 770)

| Item              | % Scoring Categories Endorsed |           |               |             |              |
|-------------------|-------------------------------|-----------|---------------|-------------|--------------|
|                   | 1<br>None                     | 2<br>Mild | 3<br>Moderate | 4<br>Severe | 5<br>Extreme |
| D1.1              | 17.5                          | 26.9      | 21.8          | 22.7        | 11.0         |
| D1.2              | 19.2                          | 24.7      | 20.1          | 22.2        | 13.8         |
| D1.3              | 14.8                          | 23.4      | 26.6          | 25.2        | 10.0         |
| D1.4              | 35.1                          | 22.2      | 18.7          | 14.0        | 10.0         |
| D1.5              | 34.0                          | 35.2      | 16.6          | 11.7        | 2.6          |
| D1.6              | 29.0                          | 27.1      | 18.1          | 17.3        | 8.8          |
| D2.1              | 46.8                          | 17.1      | 11.6          | 13.5        | 11.0         |
| D2.2              | 55.6                          | 19.0      | 10.5          | 12.0        | 3.0          |
| D2.3              | 62.2                          | 17.1      | 11.0          | 7.5         | 2.1          |
| D2.4              | 36.8                          | 25.6      | 14.9          | 16.6        | 6.1          |
| D2.5              | 56.6                          | 16.5      | 8.6           | 9.0         | 9.4          |
| D3.1              | 70.3                          | 14.8      | 6.6           | 5.7         | 2.6          |
| D3.2              | 72.1                          | 13.4      | 6.8           | 5.8         | 2.0          |
| D3.3              | 47.5                          | 24.2      | 13.6          | 10.5        | 4.0          |
| D3.4              | 42.3                          | 18.8      | 15.3          | 12.9        | 10.7         |
| D4.1              | 31.8                          | 30.1      | 15.3          | 14.2        | 8.6          |
| D4.2              | 26.4                          | 26.1      | 21.3          | 18.3        | 7.9          |
| D4.3              | 37.7                          | 29.7      | 18.6          | 11.3        | 2.7          |
| D4.4              | 28.8                          | 16.6      | 16.5          | 15.5        | 22.6         |
| D4.5              | 38.1                          | 16.1      | 14.2          | 12.3        | 19.4         |
| D5.1              | 22.1                          | 27.5      | 21.0          | 19.7        | 9.6          |
| D5.2              | 30.8                          | 28.2      | 17.0          | 16.5        | 7.5          |
| D5.3              | 23.1                          | 24.3      | 21.3          | 20.1        | 11.2         |
| D5.4              | 24.6                          | 24.3      | 18.6          | 20.1        | 12.5         |
| D5.5 <sup>a</sup> | 13.9                          | 23.8      | 17.6          | 22.8        | 22.2         |
| D5.6 <sup>a</sup> | 17.6                          | 25.3      | 17.0          | 18.5        | 21.6         |
| D5.7 <sup>a</sup> | 20.9                          | 20.3      | 19.5          | 17.0        | 22.4         |
| D5.8 <sup>a</sup> | 21.3                          | 21.3      | 17.4          | 17.0        | 23.0         |
| D6.1              | 19.2                          | 19.2      | 20.4          | 25.8        | 15.3         |
| D6.2              | 25.6                          | 19.6      | 20.5          | 23.3        | 11.0         |
| D6.3              | 33.6                          | 23.3      | 17.9          | 19.2        | 6.0          |
| D6.4              | 14.6                          | 24.6      | 23.4          | 25.6        | 12.0         |

|      |      |      |      |      |      |
|------|------|------|------|------|------|
| D6.5 | 9.9  | 17.0 | 23.0 | 28.6 | 22.0 |
| D6.6 | 51.7 | 18.6 | 11.3 | 11.0 | 7.4  |
| D6.7 | 23.6 | 24.4 | 22.0 | 20.1 | 9.9  |
| D6.8 | 13.4 | 16   | 22.1 | 25.1 | 23.5 |

---

<sup>a</sup> n = 483
